# Supplementary material for: Which health-related reasons lead to prehospital emergency care and how does subjective emergency status connect to subsequent care?
Source: Springer Nature journal article supplement (doi:10.1007/s10049-020-00832-2), 2021-02-09
Supplement: MOESM1 [file 19031910]

**Appendix 1:**

**Tab.1: Percentage of respondents checking listed self-reported complaints per group**  
 (listed are all self-perceived complaints with n ≥5 for principal diagnoses of ICD chapters XIX or IX; in total 253 persons answered question set on all self-perceived complaints listed in the questionnaire; 173 persons had inpatient diagnoses)

| Group of respondents →       | Comparison group for tests of significance ↓      | Comparison group for tests of significance ↓          |                                        |                                                       |                                        | Comparison group for tests of significance ↓     |                                                  |                                      |                                                      | All respondents (n=253)              |              |
|------------------------------|---------------------------------------------------|-------------------------------------------------------|----------------------------------------|-------------------------------------------------------|----------------------------------------|--------------------------------------------------|--------------------------------------------------|--------------------------------------|------------------------------------------------------|--------------------------------------|--------------|
|                              | Respondents with inpatient ICD chapter XIX (n=47) | Inpatient respondents without ICD chapter XIX (n=126) |                                        | All respondents without inpatient chapter XIX (n=206) |                                        | Respondents with inpatient ICD chapter IX (n=44) | Inpatient respondents without chapter IX (n=129) |                                      | All respondents without inpatient chapter IX (n=209) |                                      |              |
| Self-perceived complaints ↓  | %; n                                              | %; n                                                  | V; p                                   | %; n                                                  | V; p                                   | %; n                                             | %; n                                             | V; p                                 | %; n                                                 | V; p                                 | %; n         |
| <b>Pain</b>                  | 48.9 %; n=23                                      | 31.0 %; n=39                                          | V=0.17; p=0.03; p <sub>r</sub> =0.03   | 35.4% ; n=73                                          | V=0.11; p=0.085; p <sub>r</sub> =0.10  | 29.5 %; n=13                                     | 38.0%; n=49                                      | V=0.07; p=0.31; p <sub>r</sub> =0.37 | 39.7 %; n=83                                         | V=0.08; p=0.21; p <sub>r</sub> =0.23 | 37.9 %; n=96 |
| <b>Bone fracture</b>         | 44.7 %; n=21                                      | Not reported; n<5                                     |                                        | 5.8%; n=12                                            | V=0.45; p<0.001; p <sub>r</sub> <0.001 | Not reported; n<5                                | 17.8 %; n=25                                     | Not reported as comparison group n<5 | 14.8 %; n=31                                         | Not reported as comparison group n<5 | 13.0 %; n=33 |
| <b>Fall from low height</b>  | 34.0 %; n=16                                      | 7.9; n=10                                             | V=0.34; p<0.001; p <sub>r</sub> =0.001 | 11.2% ; n=23                                          | V=0.25; p<0.001; p <sub>r</sub> <0.001 | Not reported; n<5                                | 19.4 %; n=25                                     | Not reported as comparison group n<5 | 18.2 %; n=38                                         | Not reported as comparison group n<5 | 15.4 %; n=39 |
| <b>Loss of consciousness</b> | 23.4%; n=11                                       | 15.9 %; n=20                                          | V=0.009; p=0.25; p <sub>r</sub> =0.27  | 15.0% ; n=31                                          | V=0.09; p=0.17; p <sub>r</sub> =0.19   | 11.4 %; n=5                                      | 20.2%; n=26                                      | V=0.10; p=0.19; p <sub>r</sub> =0.26 | 17.7 %; n=37                                         | V=0.07; p=0.30; p <sub>r</sub> =0.38 | 16.6 %; n=42 |

*Piedmont et al.: Which health-related reasons lead to prehospital emergency care and how does self-perceived emergency status connect to subsequent care?*

| Group of respondents →                 | Comparison group for tests of significance ↓      |                                                       |                                        | Comparison group for tests of significance ↓          |                                      |                                                  |                                                  |                                       |                                                      | All respondents (n=253)              |              |
|----------------------------------------|---------------------------------------------------|-------------------------------------------------------|----------------------------------------|-------------------------------------------------------|--------------------------------------|--------------------------------------------------|--------------------------------------------------|---------------------------------------|------------------------------------------------------|--------------------------------------|--------------|
|                                        | Respondents with inpatient ICD chapter XIX (n=47) | Inpatient respondents without ICD chapter XIX (n=126) |                                        | All respondents without inpatient chapter XIX (n=206) |                                      | Respondents with inpatient ICD chapter IX (n=44) | Inpatient respondents without chapter IX (n=129) |                                       | All respondents without inpatient chapter IX (n=209) |                                      |              |
| <b>Traffic accident</b>                | 21.3 %; n=10                                      | 4.0%; n=5                                             | V=0.27; p<0.001; p <sub>r</sub> =0.001 | 8.7 %; n=18                                           | V=0.16; p=0.01; p <sub>r</sub> =0.02 | Not reported; n<5                                | 10.1%; n=13                                      | Not reported as comparison group n<5  | 12.4 %; n=26 ;                                       | Not reported as comparison group n<5 | 11.1 %; n=28 |
| <b>Fall from high height</b>           | 17.0 %; n=8                                       | Not reported; n<5                                     |                                        | Not reported; n<5                                     |                                      | Not reported; n<5                                | 6.2%; n=8                                        | Not reported as comparison group n<5  | 4.3 %; n=9                                           | Not reported as comparison group n<5 | 3.6%; n=9    |
| <b>Bleeding</b>                        | 17.0 %; n=8                                       | 8.7%; n=11                                            | V=0.12; p=0.12; p <sub>r</sub> =0.17   | 14.1 %; n=29                                          | V=0.03; p=0.61; p <sub>r</sub> =0.65 | Not reported; n<5                                | 12.4%; n=16                                      | Not reported as comparison group n<5  | 16.3 %; n=34                                         | Not reported as comparison group n<5 | 14.6 %; n=37 |
| <b>Other injuries</b>                  | 14.9 %; n=7                                       | Not reported; n<5                                     |                                        | 5.8%; n=12                                            | V=0.13; p=0.03; p <sub>r</sub> =0.06 | Not reported; n<5                                | 7.0%; n=9                                        | Not reported as comparison group n<5  | 8.6 %; n=18                                          | Not reported as comparison group n<5 | 7.5 %; n=19  |
| <b>Problems with heart/circulation</b> | 14.9 %; n=7                                       | 38.9 %; n=56                                          | V=0.23; p=0.003; p <sub>r</sub> =0.003 | 35.9 %; n=74                                          | V=0.18; p=0.01; p <sub>r</sub> =0.01 | 50.0 %; n=22                                     | 26.4%; n=34                                      | V=0.22; p=0.004; p <sub>r</sub> =0.01 | 28.2 %; n=59                                         | V=0.18; p=0.01; p <sub>r</sub> =0.01 | 32.0 %; n=81 |

Piedmont et al.: Which health-related reasons lead to prehospital emergency care and how does self-perceived emergency status connect to subsequent care?

| Group of respondents →    | Comparison group for tests of significance ↓      |                                                       |                                      |                                                       | Comparison group for tests of significance ↓ |                                                  |                                                  |                                       | All respondents (n=253) |                                                      |              |
|---------------------------|---------------------------------------------------|-------------------------------------------------------|--------------------------------------|-------------------------------------------------------|----------------------------------------------|--------------------------------------------------|--------------------------------------------------|---------------------------------------|-------------------------|------------------------------------------------------|--------------|
|                           | Respondents with inpatient ICD chapter XIX (n=47) | Inpatient respondents without ICD chapter XIX (n=126) |                                      | All respondents without inpatient chapter XIX (n=206) |                                              | Respondents with inpatient ICD chapter IX (n=44) | Inpatient respondents without chapter IX (n=129) |                                       |                         | All respondents without inpatient chapter IX (n=209) |              |
| <b>Stroke</b>             | Not reported; n<5                                 | 14.3 %, n=18                                          | Not reported as comparison group n<5 | 10.2% ; n=21                                          | Not reported as comparison group n<5         | 22.7 %; n=10                                     | 7.0%; n=9                                        | V=0.22; p=0.004; p <sub>r</sub> =0.01 | 5.7 %; n=12             | V=0.23; p<0.001; p <sub>r</sub> =0.001               | 8.7 %; n=22  |
| <b>Problems breathing</b> | Not reported; n<5                                 | 12.7%; n=16                                           | Not reported as comparison group n<5 | 12.1% ; n=25                                          | Not reported as comparison group n<5         | 18.2 %; n=8                                      | 9.3%; n=12                                       | V=0.12; p=0.11; p <sub>r</sub> =0.17  | 10.0 %; n=21            | V=0.10; p=0.12; p <sub>r</sub> =0.13                 | 11.5 %; n=29 |

**Tab.2:**

| Self-perceived complaints ↓            | Respondents with inpatient ICD chapter XIX (n=47);<br>%, n | Respondents with inpatient ICD chapter IX (n=44);<br>%, n | V; p; p <sub>f</sub>                     |
|----------------------------------------|------------------------------------------------------------|-----------------------------------------------------------|------------------------------------------|
| <b>Pain</b>                            | 48.9 %; n=23                                               | 29.5 %; n=13                                              | V=0.20; p=0.06; p <sub>f</sub> =0.09     |
| <b>Bone fracture</b>                   | 44.7 %; n=21                                               | Not reported;<br>n<5                                      | Not reported as one comparison group n<5 |
| <b>Fall from low height</b>            | 34.0 %; n=16                                               | Not reported;<br>n<5                                      | Not reported as one comparison group n<5 |
| <b>Loss of consciousness</b>           | 23.4%; n=11                                                | 11.4 %; n=5                                               | V=0.16; p=0.13; p <sub>f</sub> =0.17     |
| <b>Traffic accident</b>                | 21.3 %; n=10                                               | Not reported;<br>n<5                                      | Not reported as one comparison group n<5 |
| <b>Fall from high height</b>           | 17.0 %; n=8                                                | Not reported;<br>n<5                                      | Not reported as one comparison group n<5 |
| <b>Bleeding</b>                        | 17.0 %; n=8                                                | Not reported;<br>n<5                                      | Not reported as one comparison group n<5 |
| <b>Other injuries</b>                  | 14.9 %; n=7                                                | Not reported;<br>n<5                                      | Not reported as one comparison group n<5 |
| <b>Problems with heart/circulation</b> | 14.9 %; n=7                                                | 50.0 %; n=22                                              | V=0.38; p<0.001; p <sub>f</sub> =0.001   |
| <b>Stroke</b>                          | Not reported;<br>n<5                                       | 22.7 %; n= 10                                             | Not reported as one comparison group n<5 |
| <b>Problems breathing</b>              | Not reported;<br>n<5                                       | 18.2 %; n=8                                               | Not reported as one comparison group n<5 |

Legend: ICD Chapter XIX: Injury, poisoning or certain other consequences of external causes  
 ICD Chapter IX: Diseases of the circulatory system

according to the German ICD-10-GM Coding system

V: Cramér's V  
 p values: p = p value based on Pearson's chi<sup>2</sup> test  
 p<sub>f</sub> = p value based on Fisher's exact test

Example of interpretation: As displayed in Table 1, persons with an inpatient principal diagnosis of chapter XIX report bone fracture significantly more often than all other respondents (with or without any inpatient care; p values <0.001; V=0.45).
